# Supplementary material
Source: PubMed Central journal article supplement (PMC153061)
Supplement: pnas_0534764100_3.pdf [file pnas_0534764100_3.pdf]

**Table 1.** Sequences and Relative Stat3-DNA Binding Affinities of Stat3 Decoy and Mutant Control Decoys

|                        |                                                      |                                          | <u>Relative Binding<br/>to STAT3</u> |
|------------------------|------------------------------------------------------|------------------------------------------|--------------------------------------|
| STAT3 Decoy<br>(hS1 E) | 5' - CATTCCCGTAAATC- 3'<br>3' - GTAAAGGGCATTAC- 5'   |                                          | ++++                                 |
| SIE                    | 5' - CAGTCCCTTAAATC- 3'<br>3' - GTCAGGGGAATTTAG- 5'  |                                          | ++                                   |
|                        | <u>Mutants of STAT3 Decoy</u>                        | <u>Number of Base<br/>Pair Mutations</u> |                                      |
| Mit ant 1              | 5' - CAGTCCCGTAAATC- 3'<br>3' - GTCAGGGCATTAG- 5'    | 1                                        | +++                                  |
| Mit ant 2              | 5' - CATTTCACGTAAATC- 3'<br>3' - GTAAAGTGCATTAG- 5'  | 1                                        | +                                    |
| Mit ant 3              | 5' - CATTCCCTTAAATC- 3'<br>3' - GTAAAGGGAATTTAG- 5'  | 1                                        | -                                    |
| Mit ant 4              | 5' - CATTCCCGTCAATC- 3'<br>3' - GTAAAGGGCAGTTAG- 5'  | 1                                        | ++                                   |
| Mit ant 5              | 5' - CAGTTCACGTAAATC- 3'<br>3' - GTCAAGTGCATTAG- 5'  | 2                                        | ++                                   |
| Mit ant 6              | 5' - CAGTCCCGTCAATC- 3'<br>3' - GTCAAGGGCAGTTAG- 5'  | 2                                        | +                                    |
| Mit ant 7              | 5' - CATTTCACGTCAATC- 3'<br>3' - GTAAAGTGCAGTTAG- 5' | 2                                        | +                                    |
| Mit ant 8              | 5' - CATTCCCTTCAATC- 3'<br>3' - GTAAAGGGAAGTTAG- 5'  | 2                                        | +++                                  |
| Mit ant 9              | 5' - CAGTTCACGTCAATC- 3'<br>3' - GTCAAGTGCAGTTAG- 5' | 3                                        | +/-                                  |
| Mit ant 10             | 5' - CAGTCCCTTCAATC- 3'<br>3' - GTCAAGGGAAGTTAG- 5'  | 3                                        | +/-                                  |

Key: Underlined bases = Bases mutated from Stat3 decoy
