# Supplementary material
Source: PubMed Central journal article supplement (PMC153061)

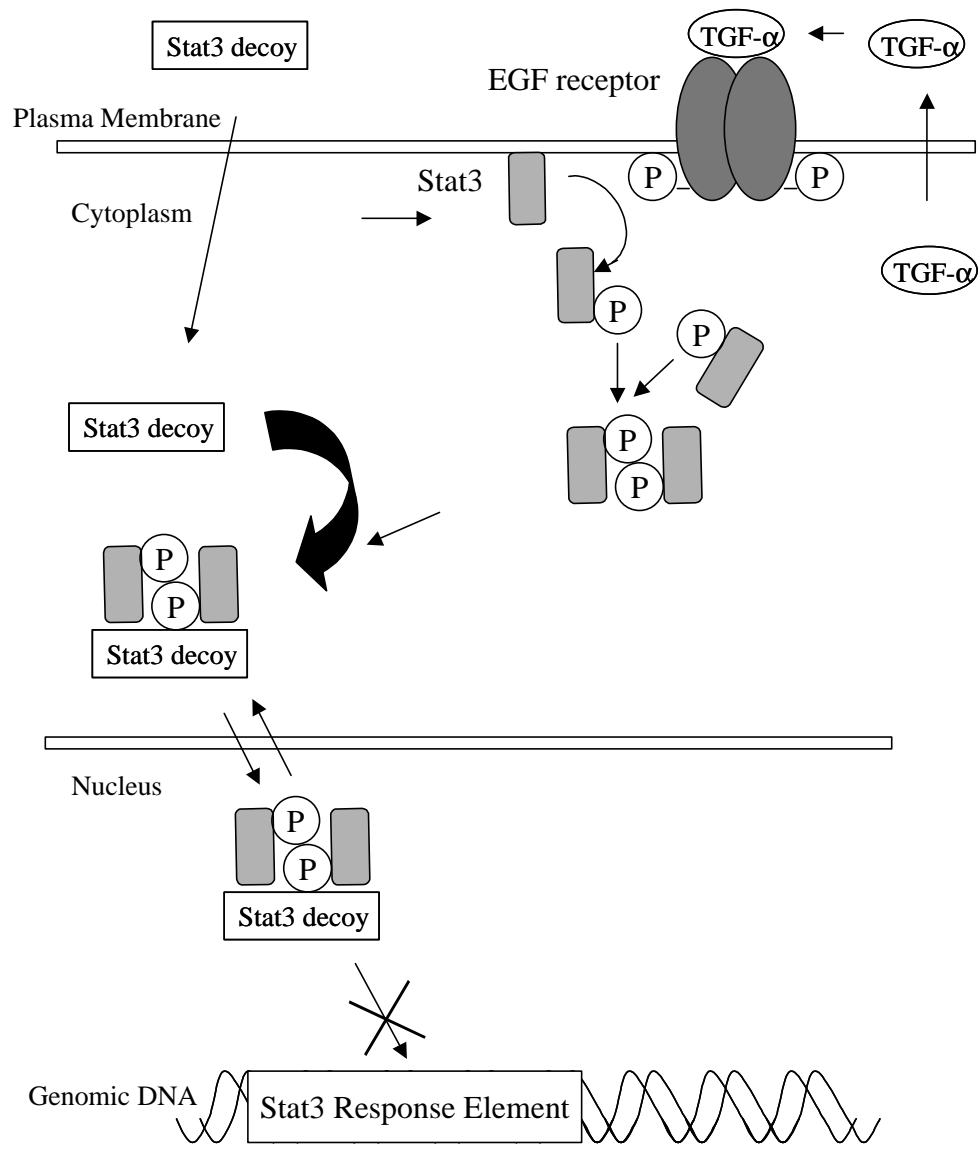

Supplement: pnas_0534764100_2.pdf [file pnas_0534764100_2.pdf]

A

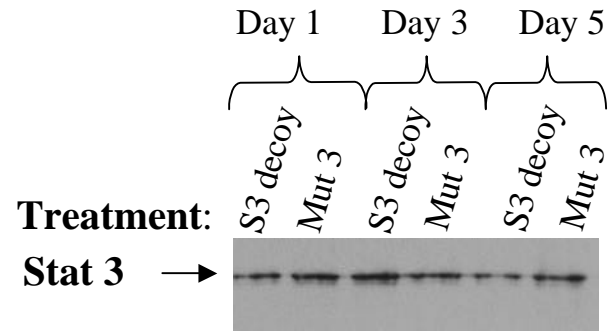

B

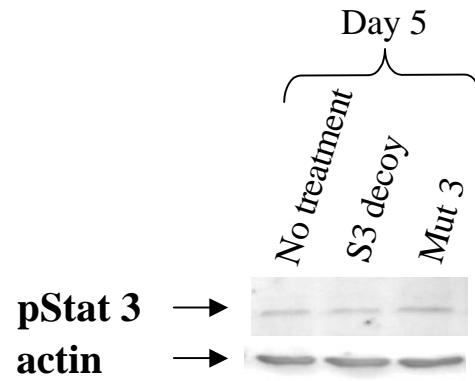

C

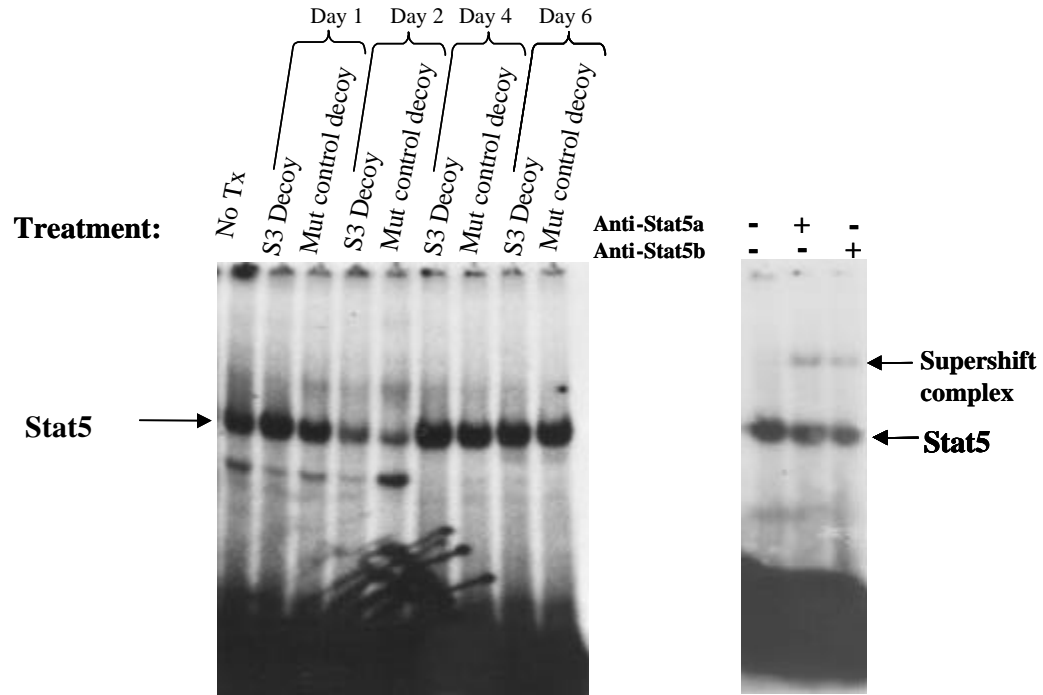

D

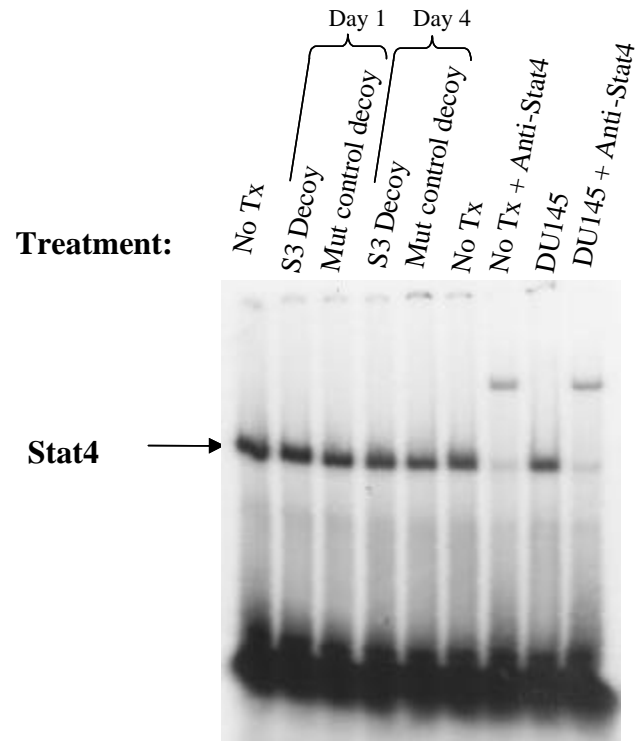

Supplement: pnas_0534764100_6.pdf [file pnas_0534764100_6.pdf]

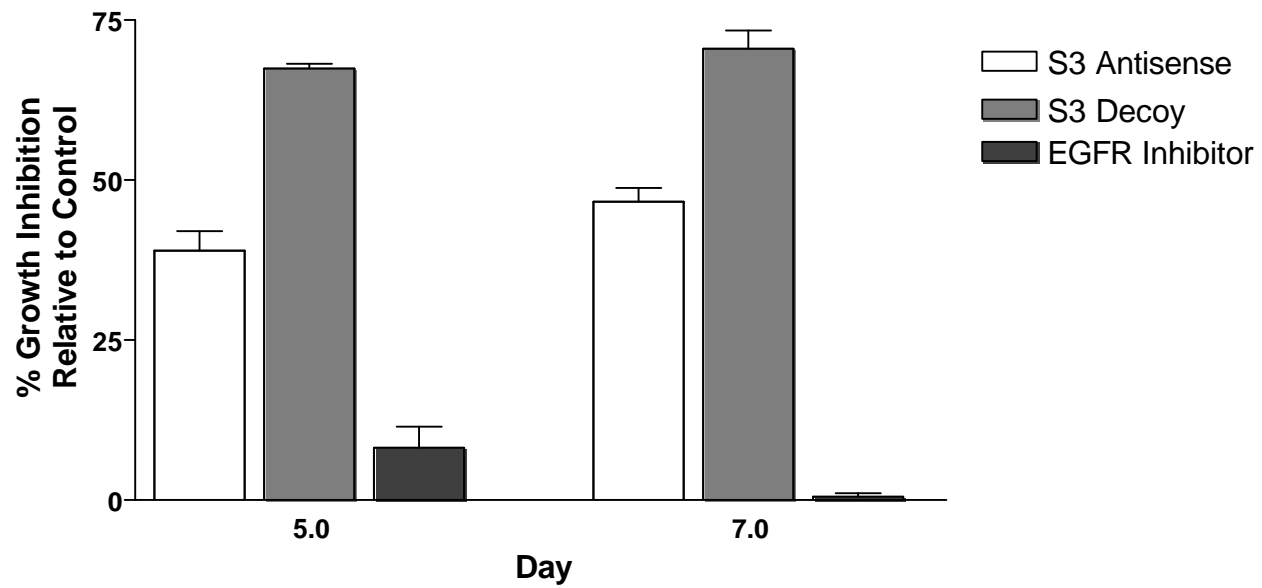

Supplement: pnas_0534764100_8.pdf [file pnas_0534764100_8.pdf]
